# Supplementary material for: Causal relationships between dietary habits and Barrett's esophagus risk: a univariable and multivariable Mendelian randomization study
Source: Royal Society of Chemistry journal article supplement (doi:10.1039/d3fo05273g), 2024-01-01
Supplement: d3fo05273g1.pdf [file d3fo05273g1.pdf]

- 1 **Figure S1.** Forest plots from genetically predicted effects assessed the 17 dietary habits
- 2 on Barrett's Esophagus risk.
- 3 **Figure S2.** Scatter plots from genetically predicted effects assessed the 17 dietary habits
- 4 on Barrett's Esophagus risk. The slopes of each line with different color indicate the
- 5 causal relationship between dietary habits and BE risk for each method.
- 6 **Figure S3.** Leave-one-out sensitivity analysis of MR estimate assessed 17 dietary
- 7 habits on Barrett's Esophagus risk. MR, Mendelian randomization.
- 8 **Figure S4.** Funnel plot of MR estimate assessed 17 dietary habits on Barrett's
- 9 Esophagus risk. MR, Mendelian randomization.
- 10
