# Supplementary material for: Causal relationships between dietary habits and Barrett's esophagus risk: a univariable and multivariable Mendelian randomization study
Source: Royal Society of Chemistry journal article supplement (doi:10.1039/d3fo05273g), 2024-01-01
Supplement: d3fo05273g6.pdf [file d3fo05273g6.pdf]

Table S1. Detailed information of the questionnaire contents for 17 ordinary dietary habits.

| <b>Exposures</b>           | <b>Touchscreen question</b>                                                                                                                                     | <b>Value type</b>        |
|----------------------------|-----------------------------------------------------------------------------------------------------------------------------------------------------------------|--------------------------|
| Alcohol intake frequency   | About how often do you drink alcohol?                                                                                                                           | Categorical (single)     |
| Processed meat intake      | How often do you eat processed meats (such as bacon, ham, sausages, meat pies, kebabs, burgers, chicken nuggets)?                                               | Categorical (single)     |
| Poultry intake             | How often do you eat chicken, turkey or other poultry? (Do not count processed meats)                                                                           | Categorical (single)     |
| Beef intake                | How often do you eat beef? (Do not count processed meats)                                                                                                       | Categorical (single)     |
| Non-oily fish intake       | How often do you eat other types of fish? (e.g. cod, tinned tuna, haddock)                                                                                      | Categorical (single)     |
| Oily fish intake           | How often do you eat oily fish? (e.g. sardines, salmon, mackerel, herring)                                                                                      | Categorical (single)     |
| Pork intake                | How often do you eat pork? (Do not count processed meats such as bacon or ham)                                                                                  | Categorical (single)     |
| Lamb/mutton intake         | How often do you eat lamb/mutton? (Do not count processed meats)                                                                                                | Categorical (single)     |
| Bread intake               | How many slices of bread do you eat each WEEK?                                                                                                                  | Integer, slices/week     |
| Cheese intake              | How often do you eat cheese? (Include cheese in pizzas, quiches, cheese sauce etc)                                                                              | Categorical (single)     |
| Cooked vegetable intake    | On average how many heaped tablespoons of COOKED vegetables would you eat per DAY? (Do not include potatoes; put '0' if you do not eat any)                     | Integer, tablespoons/day |
| Tea intake                 | How many cups of tea do you drink each DAY? (Include black and green tea)                                                                                       | Integer, cups/day        |
| Fresh fruit intake         | About how many pieces of FRESH fruit would you eat per DAY? (Count one apple, one banana, 10 grapes etc as one piece; put '0' if you do not eat any)            | Integer, pieces/day      |
| Cereal intake              | How many bowls of cereal do you eat a WEEK?                                                                                                                     | Integer, bowls/week      |
| Salad/raw vegetable intake | On average how many heaped tablespoons of SALAD or RAW vegetables would you eat per DAY? (Include lettuce, tomato in sandwiches; put '0' if you do not eat any) | Integer, tablespoons/day |
| Coffee intake              | How many cups of coffee do you drink each DAY? (Include decaffeinated coffee)                                                                                   | Integer, cups/day        |
| Dried fruit intake         | About how many pieces of DRIED fruit would you eat per DAY? (Count one prune, one dried apricot, 10 raisins as one piece; put '0' if you do not eat any)        | Integer, pieces/day      |
