# Supplementary material for: Causal relationships between dietary habits and Barrett's esophagus risk: a univariable and multivariable Mendelian randomization study
Source: Royal Society of Chemistry journal article supplement (doi:10.1039/d3fo05273g), 2024-01-01
Supplement: d3fo05273g7.pdf [file d3fo05273g7.pdf]

**Table S2. Instrument variables of 17 ordinary dietary habits**

| 1. Alcohol intake frequency |                  |               |              |          |           |          |             |                |             |              |
|-----------------------------|------------------|---------------|--------------|----------|-----------|----------|-------------|----------------|-------------|--------------|
| SNP                         | Position(chr:BP) | Effect allele | Other allele | EAF      | Beta      | SE       | P value     | R <sup>2</sup> | Sample size | F statistics |
| rs10792669                  | 11:82688356      | G             | A            | 0.505254 | 0.017432  | 0.003041 | 9.90011E-09 | 0.000152       | 462346      | 69.96268     |
| rs11223617                  | 11:133780757     | A             | G            | 0.206155 | 0.025091  | 0.003754 | 2.29985E-11 | 0.000206       | 462346      | 94.89691     |
| rs11700855                  | 21:34270051      | G             | A            | 0.093465 | -0.029795 | 0.005233 | 0.000000012 | 0.00015        | 462346      | 69.2771      |
| rs11750777                  | 5:166830787      | A             | G            | 0.209454 | -0.020493 | 0.003726 | 3.79997E-08 | 0.000139       | 462346      | 64.04589     |
| rs13102973                  | 4:135900688      | C             | T            | 0.61881  | -0.019407 | 0.003119 | 4.90004E-10 | 0.000178       | 462346      | 81.82872     |
| rs13178443                  | 5:145615275      | T             | C            | 0.276349 | -0.018652 | 0.00339  | 3.79997E-08 | 0.000139       | 462346      | 64.07427     |
| rs13390019                  | 2:97797680       | C             | T            | 0.134041 | 0.029612  | 0.004492 | 4.30031E-11 | 0.000204       | 462346      | 93.74565     |
| rs1666658                   | 11:121801129     | C             | T            | 0.392206 | 0.017967  | 0.003099 | 6.69993E-09 | 0.000154       | 462346      | 70.87808     |
| rs17662759                  | 2:193989223      | C             | T            | 0.089115 | 0.030135  | 0.00546  | 3.40001E-08 | 0.000147       | 462346      | 67.89206     |
| rs186347                    | 14:59072226      | T             | G            | 0.463343 | 0.017949  | 0.003051 | 0.000000004 | 0.00016        | 462346      | 73.7817      |
| rs1893659                   | 18:21080859      | A             | C            | 0.459939 | -0.029326 | 0.003053 | 7.59976E-22 | 0.000427       | 462346      | 196.80598    |
| rs1937522                   | 13:68080817      | G             | A            | 0.528054 | 0.016898  | 0.003032 | 0.000000025 | 0.000142       | 462346      | 65.53932     |
| rs2043677                   | 18:38313195      | T             | C            | 0.145599 | 0.026113  | 0.004327 | 1.6E-09     | 0.00017        | 462346      | 78.13063     |
| rs2535911                   | 14:73523162      | T             | C            | 0.354749 | -0.018848 | 0.003168 | 2.69998E-09 | 0.000163       | 462346      | 74.8922      |
| rs262240                    | 3:68408109       | T             | C            | 0.468553 | -0.017207 | 0.003035 | 1.40001E-08 | 0.000147       | 462346      | 67.90426     |
| rs2717063                   | 2:58110969       | A             | C            | 0.585731 | -0.02037  | 0.003085 | 4.00037E-11 | 0.000201       | 462346      | 92.74088     |
| rs28622224                  | 4:55088093       | T             | C            | 0.280364 | -0.01862  | 0.003368 | 0.000000032 | 0.00014        | 462346      | 64.42779     |
| rs28787109                  | 1:51218695       | A             | G            | 0.40423  | 0.017811  | 0.003085 | 7.69999E-09 | 0.000153       | 462346      | 70.36221     |
| rs34440851                  | 8:87214346       | T             | C            | 0.157151 | -0.022683 | 0.004151 | 4.60002E-08 | 0.000136       | 462346      | 62.76751     |
| rs34631026                  | 16:6172126       | T             | C            | 0.446061 | -0.016913 | 0.003048 | 2.90001E-08 | 0.000141       | 462346      | 65.09575     |
| rs4241258                   | 2:74226102       | T             | C            | 0.13763  | 0.025064  | 0.004403 | 1.29999E-08 | 0.000149       | 462346      | 68.66927     |
| rs4417025                   | 1:35363679       | A             | G            | 0.361153 | -0.018838 | 0.003165 | 2.69998E-09 | 0.000164       | 462346      | 75.40987     |
| rs461599                    | 5:144136931      | C             | A            | 0.462259 | -0.019189 | 0.00304  | 2.69998E-10 | 0.000183       | 462346      | 84.30196     |

|            |             |   |   |          |           |          |             |          |        |           |
|------------|-------------|---|---|----------|-----------|----------|-------------|----------|--------|-----------|
| rs4916723  | 5:87854395  | C | A | 0.420617 | 0.023948  | 0.0031   | 1.10002E-14 | 0.00028  | 462346 | 128.7398  |
| rs5022348  | 18:22639237 | T | C | 0.40703  | 0.020264  | 0.00357  | 1.40001E-08 | 0.000198 | 462346 | 91.28593  |
| rs550942   | 11:58394154 | T | C | 0.823865 | 0.022401  | 0.003989 | 0.00000002  | 0.000146 | 462346 | 67.06621  |
| rs6030200  | 20:35554361 | A | G | 0.31415  | -0.019529 | 0.003271 | 2.39999E-09 | 0.000164 | 462346 | 75.68357  |
| rs6727281  | 2:65558588  | T | C | 0.184023 | -0.024322 | 0.00392  | 5.49997E-10 | 0.000178 | 462346 | 81.8144   |
| rs71651683 | 22:24828853 | T | C | 0.0142   | -0.070459 | 0.012791 | 3.59998E-08 | 0.000139 | 462346 | 64.0049   |
| rs72769229 | 2:2220795   | T | A | 0.154942 | -0.023135 | 0.004192 | 3.40001E-08 | 0.00014  | 462346 | 64.54566  |
| rs728538   | 16:51205819 | G | T | 0.168868 | 0.022875  | 0.004063 | 1.79999E-08 | 0.000147 | 462346 | 67.64177  |
| rs7330939  | 13:49971400 | T | C | 0.720352 | -0.02133  | 0.003405 | 3.69999E-10 | 0.000183 | 462346 | 84.41621  |
| rs780569   | 1:4569436   | A | T | 0.70882  | 0.019803  | 0.003365 | 0.000000004 | 0.000162 | 462346 | 74.54988  |
| rs838145   | 19:49248730 | A | G | 0.542982 | 0.021955  | 0.003055 | 6.70039E-13 | 0.000239 | 462346 | 110.17564 |
| rs9403297  | 6:141705482 | A | G | 0.372967 | 0.018823  | 0.00313  | 1.79999E-09 | 0.000166 | 462346 | 76.31904  |

## 2. Processed meat intake

| SNP        | Position(chr:BP) | Effect allele | Other allele | EAF      | Beta      | SE       | P value     | R <sup>2</sup> | Sample size | F statistics |
|------------|------------------|---------------|--------------|----------|-----------|----------|-------------|----------------|-------------|--------------|
| rs10454812 | 5:52800358       | C             | A            | 0.103032 | -0.01996  | 0.003442 | 6.69993E-09 | 7.36E-05       | 461981      | 33.90797     |
| rs11032380 | 11:33800533      | T             | A            | 0.333352 | -0.013323 | 0.002223 | 2.1E-09     | 7.89E-05       | 461981      | 36.32749     |
| rs3762621  | 2:173306140      | T             | C            | 0.183451 | -0.01499  | 0.00272  | 3.59998E-08 | 6.73E-05       | 461981      | 30.9963      |
| rs4778053  | 15:93424341      | G             | C            | 0.843808 | 0.016467  | 0.002899 | 1.29999E-08 | 7.15E-05       | 461981      | 32.91172     |
| rs6484504  | 11:31424823      | C             | T            | 0.72462  | 0.015473  | 0.002348 | 4.40048E-11 | 9.55E-05       | 461981      | 43.9973      |
| rs6765179  | 3:25276416       | A             | G            | 0.309968 | -0.01276  | 0.002266 | 1.79999E-08 | 6.97E-05       | 461981      | 32.07319     |
| rs6786550  | 3:62560523       | C             | T            | 0.635043 | 0.012187  | 0.002174 | 0.000000021 | 6.88E-05       | 461981      | 31.70147     |
| rs8096167  | 18:34800257      | C             | T            | 0.1926   | -0.014594 | 0.002671 | 4.70002E-08 | 6.62E-05       | 461981      | 30.50062     |

## 3. Poultry intake

| SNP       | Position(chr:BP) | Effect allele | Other allele | EAF      | Beta      | SE       | P value     | R <sup>2</sup> | Sample size | F statistics |
|-----------|------------------|---------------|--------------|----------|-----------|----------|-------------|----------------|-------------|--------------|
| rs1051730 | 15:78894339      | A             | G            | 0.331381 | -0.010876 | 0.001929 | 0.000000017 | 5.24E-05       | 461900      | 24.1359      |
| rs2426440 | 20:50999841      | G             | A            | 0.732602 | 0.011218  | 0.002053 | 4.70002E-08 | 4.93E-05       | 461900      | 22.70175     |
| rs2565017 | 18:21070280      | A             | G            | 0.372697 | 0.010952  | 0.001882 | 5.89997E-09 | 5.61E-05       | 461900      | 25.82313     |
| rs2965200 | 19:19476365      | A             | G            | 0.640011 | -0.01042  | 0.001901 | 4.20001E-08 | 5E-05          | 461900      | 23.0363      |
| rs7829800 | 8:144258705      | G             | A            | 0.670759 | 0.011458  | 0.001943 | 3.69999E-09 | 5.8E-05        | 461900      | 26.70098     |
| rs9923768 | 16:6163838       | A             | G            | 0.59853  | 0.010512  | 0.001859 | 0.000000016 | 5.31E-05       | 461900      | 24.45466     |

#### 4. Beef intake

| SNP        | Position(chr:BP) | Effect allele | Other allele | EAF      | Beta      | SE       | P value     | R <sup>2</sup> | Sample size | F statistics |
|------------|------------------|---------------|--------------|----------|-----------|----------|-------------|----------------|-------------|--------------|
| rs10789340 | 1:72940273       | G             | A            | 0.626712 | -0.01378  | 0.001769 | 6.79986E-15 | 8.88E-05       | 461053      | 40.91044     |
| rs10959890 | 9:11526198       | C             | T            | 0.212297 | -0.012666 | 0.002096 | 1.5E-09     | 5.37E-05       | 461053      | 24.7058      |
| rs11165829 | 1:97743702       | G             | C            | 0.35997  | -0.0102   | 0.001779 | 9.80009E-09 | 4.79E-05       | 461053      | 22.07498     |
| rs11878917 | 19:42588999      | A             | G            | 0.109688 | 0.015019  | 0.002748 | 4.60002E-08 | 4.41E-05       | 461053      | 20.28566     |
| rs132901   | 22:41797547      | T             | C            | 0.787662 | 0.013925  | 0.002093 | 2.90001E-11 | 6.49E-05       | 461053      | 29.86647     |
| rs1421085  | 16:53800954      | C             | T            | 0.403433 | -0.012123 | 0.001743 | 3.50026E-12 | 7.07E-05       | 461053      | 32.57616     |
| rs1470610  | 2:33866464       | C             | G            | 0.196185 | -0.012216 | 0.002158 | 0.000000015 | 4.71E-05       | 461053      | 21.67191     |
| rs62169335 | 2:147946069      | T             | C            | 0.543241 | -0.009686 | 0.001735 | 2.39999E-08 | 4.66E-05       | 461053      | 21.43966     |
| rs62396185 | 6:26180634       | C             | G            | 0.260057 | -0.014845 | 0.001951 | 2.80027E-14 | 8.48E-05       | 461053      | 39.05265     |
| rs7791463  | 7:97819047       | A             | G            | 0.534781 | 0.009548  | 0.001711 | 2.39999E-08 | 4.54E-05       | 461053      | 20.88929     |
| rs784251   | 18:53412903      | T             | C            | 0.477649 | -0.010339 | 0.001717 | 1.7E-09     | 5.33E-05       | 461053      | 24.56011     |

#### 5. Non-oily fish intake

| SNP        | Position(chr:BP) | Effect allele | Other allele | EAF     | Beta     | SE      | P value     | R <sup>2</sup> | Sample size | F statistics |
|------------|------------------|---------------|--------------|---------|----------|---------|-------------|----------------|-------------|--------------|
| rs16822430 | 2:144147475      | C             | T            | 0.23321 | 0.011634 | 0.00192 | 1.40001E-09 | 4.84E-05       | 460880      | 22.29136     |

|            |            |   |   |          |           |          |             |          |        |          |
|------------|------------|---|---|----------|-----------|----------|-------------|----------|--------|----------|
| rs17317920 | 7:25517103 | G | A | 0.479238 | 0.00906   | 0.001631 | 2.80001E-08 | 4.1E-05  | 460880 | 18.86672 |
| rs3799077  | 6:69996217 | G | T | 0.309993 | -0.010735 | 0.001758 | 0.000000001 | 4.93E-05 | 460880 | 22.69878 |

### 6. Oily fish intake

| SNP        | Position(chr:BP) | Effect allele | Other allele | EAF      | Beta      | SE       | P value     | R <sup>2</sup> | Sample size | F statistics |
|------------|------------------|---------------|--------------|----------|-----------|----------|-------------|----------------|-------------|--------------|
| rs10061973 | 5:166811498      | T             | G            | 0.5139   | -0.010852 | 0.001916 | 0.000000015 | 5.88E-05       | 460443      | 27.09327     |
| rs11859365 | 16:83683945      | C             | A            | 0.253765 | 0.022567  | 0.002197 | 9.3994E-25  | 0.000193       | 460443      | 88.82575     |
| rs1201289  | 3:176822676      | G             | T            | 0.394525 | -0.010727 | 0.00196  | 4.39997E-08 | 5.5E-05        | 460443      | 25.31131     |
| rs12663865 | 6:88103149       | A             | G            | 0.758185 | 0.012772  | 0.002232 | 1.09999E-08 | 5.98E-05       | 460443      | 27.54268     |
| rs12896749 | 14:100279492     | C             | G            | 0.384721 | -0.010964 | 0.001966 | 0.000000025 | 5.69E-05       | 460443      | 26.20551     |
| rs17050031 | 2:59488019       | T             | C            | 0.4801   | -0.012049 | 0.001921 | 3.50002E-10 | 7.25E-05       | 460443      | 33.37363     |
| rs2374424  | 11:83187113      | G             | A            | 0.601525 | -0.011444 | 0.001956 | 4.90004E-09 | 6.28E-05       | 460443      | 28.90806     |
| rs2827161  | 21:23340050      | G             | T            | 0.422842 | 0.010711  | 0.001937 | 0.000000032 | 5.6E-05        | 460443      | 25.78657     |
| rs28533540 | 15:47867762      | A             | G            | 0.534203 | 0.014642  | 0.001925 | 2.80027E-14 | 0.000107       | 460443      | 49.13151     |
| rs28623270 | 17:29389026      | T             | A            | 0.14872  | -0.017833 | 0.002737 | 7.29962E-11 | 8.05E-05       | 460443      | 37.0783      |
| rs2952140  | 17:37928059      | T             | C            | 0.482607 | -0.010677 | 0.001915 | 0.000000025 | 5.69E-05       | 460443      | 26.21645     |
| rs303817   | 12:52176235      | G             | A            | 0.751146 | 0.01358   | 0.00221  | 8E-10       | 6.89E-05       | 460443      | 31.74651     |
| rs3124402  | 13:55975115      | G             | A            | 0.733261 | -0.022001 | 0.002157 | 1.9002E-24  | 0.000189       | 460443      | 87.20311     |
| rs4278546  | 11:79217391      | G             | A            | 0.441085 | 0.012556  | 0.001938 | 9.30037E-11 | 7.77E-05       | 460443      | 35.791       |
| rs4869859  | 6:155847549      | C             | T            | 0.449939 | 0.01401   | 0.001922 | 3.10027E-13 | 9.72E-05       | 460443      | 44.73779     |
| rs552234   | 9:106772283      | A             | G            | 0.495449 | -0.011647 | 0.001913 | 1.09999E-09 | 6.78E-05       | 460443      | 31.23169     |
| rs59355765 | 18:53431951      | T             | C            | 0.160079 | -0.016252 | 0.00261  | 4.70002E-10 | 7.1E-05        | 460443      | 32.70634     |
| rs6033437  | 20:12495731      | A             | C            | 0.257329 | 0.012468  | 0.00221  | 0.000000017 | 5.94E-05       | 460443      | 27.36084     |
| rs631490   | 11:111452040     | C             | G            | 0.709106 | -0.01514  | 0.002103 | 6.00067E-13 | 9.46E-05       | 460443      | 43.54429     |
| rs6465487  | 7:95760694       | G             | A            | 0.399814 | -0.012354 | 0.001956 | 2.69998E-10 | 7.32E-05       | 460443      | 33.7256      |
| rs703987   | 10:80939219      | C             | G            | 0.615005 | 0.011122  | 0.001974 | 0.000000017 | 5.86E-05       | 460443      | 26.97201     |

|           |             |   |   |          |           |          |             |          |        |          |
|-----------|-------------|---|---|----------|-----------|----------|-------------|----------|--------|----------|
| rs7254235 | 19:22212505 | G | A | 0.577254 | -0.01063  | 0.00194  | 4.30002E-08 | 5.52E-05 | 460443 | 25.39648 |
| rs7683782 | 4:14935830  | G | C | 0.833405 | 0.014478  | 0.002574 | 1.89998E-08 | 5.82E-05 | 460443 | 26.79998 |
| rs905575  | 3:147076253 | G | C | 0.82397  | 0.013882  | 0.002519 | 3.59998E-08 | 5.59E-05 | 460443 | 25.74278 |
| rs9597870 | 13:59412819 | G | T | 0.245844 | -0.012745 | 0.00223  | 1.09999E-08 | 6.02E-05 | 460443 | 27.73472 |
| rs9606833 | 22:31750013 | C | T | 0.243593 | 0.016986  | 0.002231 | 2.70023E-14 | 0.000106 | 460443 | 48.95897 |
| rs9841174 | 3:167184878 | C | T | 0.373913 | 0.014778  | 0.00198  | 8.49963E-14 | 0.000102 | 460443 | 47.0859  |
| rs9889161 | 16:51495068 | T | G | 0.357929 | -0.01332  | 0.002002 | 2.80027E-11 | 8.16E-05 | 460443 | 37.55211 |

#### 7. Pork intake

| SNP        | Position(chr:BP) | Effect allele | Other allele | EAF      | Beta      | SE       | P value     | R <sup>2</sup> | Sample size | F statistics |
|------------|------------------|---------------|--------------|----------|-----------|----------|-------------|----------------|-------------|--------------|
| rs10972033 | 9:34269732       | T             | G            | 0.45643  | 0.008976  | 0.001479 | 1.29999E-09 | 4E-05          | 460162      | 18.40666     |
| rs11211124 | 1:45962409       | C             | T            | 0.230603 | -0.009953 | 0.001754 | 1.40001E-08 | 3.52E-05       | 460162      | 16.18524     |
| rs254152   | 5:115641827      | G             | C            | 0.23498  | -0.010427 | 0.001742 | 2.19999E-09 | 3.91E-05       | 460162      | 17.99741     |
| rs3964074  | 16:74166991      | C             | T            | 0.546932 | -0.008951 | 0.001483 | 1.6E-09     | 3.97E-05       | 460162      | 18.28321     |

#### 8. Lamb mutton

| SNP        | Position(chr:BP) | Effect allele | Other allele | EAF      | Beta      | SE       | P value     | R <sup>2</sup> | Sample size | F statistics |
|------------|------------------|---------------|--------------|----------|-----------|----------|-------------|----------------|-------------|--------------|
| rs12634740 | 3:175671450      | G             | T            | 0.252078 | -0.010087 | 0.001697 | 2.80001E-09 | 3.84E-05       | 460006      | 17.66591     |
| rs136548   | 22:27253353      | T             | C            | 0.376668 | 0.009532  | 0.001512 | 2.90001E-10 | 4.27E-05       | 460006      | 19.64745     |
| rs1556147  | 9:131936055      | T             | A            | 0.671626 | 0.009101  | 0.001559 | 5.30005E-09 | 3.65E-05       | 460006      | 16.82379     |
| rs17270057 | 19:42670527      | C             | T            | 0.113347 | 0.012653  | 0.002309 | 4.30002E-08 | 3.22E-05       | 460006      | 14.81799     |
| rs1958801  | 14:98872110      | G             | A            | 0.287998 | -0.008944 | 0.001617 | 0.000000032 | 3.28E-05       | 460006      | 15.1058      |
| rs2222760  | 2:151345113      | A             | G            | 0.28089  | -0.009093 | 0.001637 | 2.80001E-08 | 3.34E-05       | 460006      | 15.38009     |
| rs2678900  | 2:58177683       | G             | T            | 0.427924 | 0.010084  | 0.001481 | 9.8992E-12  | 4.98E-05       | 460006      | 22.92694     |
| rs276453   | 9:15573753       | C             | A            | 0.488356 | -0.014237 | 0.001467 | 2.90001E-22 | 0.000101       | 460006      | 46.64331     |

|            |             |   |   |          |           |          |             |          |        |          |
|------------|-------------|---|---|----------|-----------|----------|-------------|----------|--------|----------|
| rs2926119  | 16:64293179 | A | C | 0.569417 | 0.008111  | 0.001482 | 4.39997E-08 | 3.23E-05 | 460006 | 14.85513 |
| rs3105056  | 13:55946152 | C | T | 0.732738 | -0.011624 | 0.001649 | 1.80011E-12 | 5.29E-05 | 460006 | 24.36866 |
| rs35797675 | 7:72878044  | G | T | 0.215928 | -0.01085  | 0.001793 | 1.40001E-09 | 3.99E-05 | 460006 | 18.35396 |
| rs4272399  | 8:4836291   | A | C | 0.321491 | -0.009242 | 0.001576 | 4.49997E-09 | 3.73E-05 | 460006 | 17.15954 |
| rs56394517 | 1:243582753 | G | A | 0.09584  | -0.013775 | 0.002491 | 0.000000032 | 3.29E-05 | 460006 | 15.14214 |
| rs62398404 | 6:37669616  | T | C | 0.127211 | 0.012915  | 0.002194 | 0.000000004 | 3.7E-05  | 460006 | 17.05491 |
| rs673696   | 11:31097262 | T | C | 0.080995 | 0.015821  | 0.002682 | 3.69999E-09 | 3.73E-05 | 460006 | 17.15747 |
| rs6829572  | 4:93984155  | A | G | 0.456717 | 0.008401  | 0.001474 | 0.000000012 | 3.5E-05  | 460006 | 16.12703 |
| rs994270   | 6:51187787  | G | C | 0.234851 | 0.00982   | 0.001729 | 1.40001E-08 | 3.47E-05 | 460006 | 15.95905 |

---

9. Bread intake

| SNP        | Position(chr:BP) | Effect allele | Other allele | EAF      | Beta      | SE       | P value     | R <sup>2</sup> | Sample size | F statistics |
|------------|------------------|---------------|--------------|----------|-----------|----------|-------------|----------------|-------------|--------------|
| rs10761661 | 10:64525135      | T             | C            | 0.45322  | -0.011485 | 0.002005 | 0.00000001  | 6.54E-05       | 452236      | 30.10448     |
| rs11183201 | 12:46170982      | C             | T            | 0.507856 | -0.016725 | 0.001996 | 5.30029E-17 | 0.00014        | 452236      | 64.39168     |
| rs11628639 | 14:97837568      | C             | T            | 0.243333 | -0.013495 | 0.002322 | 6.19998E-09 | 6.71E-05       | 452236      | 30.88053     |
| rs1492988  | 2:163776010      | G             | C            | 0.599095 | 0.011545  | 0.002035 | 1.40001E-08 | 6.4E-05        | 452236      | 29.48046     |
| rs17083079 | 5:92683607       | A             | G            | 0.047423 | 0.030114  | 0.004679 | 1.2E-10     | 8.19E-05       | 452236      | 37.72765     |
| rs1940033  | 11:131882807     | T             | C            | 0.592727 | -0.011079 | 0.002028 | 4.70002E-08 | 5.93E-05       | 452236      | 27.28797     |
| rs2068650  | 5:166835294      | C             | A            | 0.472074 | -0.013938 | 0.001999 | 3.10027E-12 | 9.68E-05       | 452236      | 44.58924     |
| rs28406095 | 15:41825092      | A             | G            | 0.461729 | -0.010949 | 0.002    | 4.39997E-08 | 5.96E-05       | 452236      | 27.43891     |
| rs75287965 | 2:44673517       | A             | G            | 0.062933 | -0.024748 | 0.004097 | 1.5E-09     | 7.22E-05       | 452236      | 33.2619      |
| rs79436018 | 7:127694032      | C             | T            | 0.116276 | -0.017615 | 0.003116 | 0.000000016 | 6.38E-05       | 452236      | 29.36222     |
| rs9881332  | 3:23241798       | G             | C            | 0.581804 | 0.01137   | 0.002022 | 1.89998E-08 | 6.29E-05       | 452236      | 28.96837     |

---

10. Cheese intake

---

| SNP         | Position(chr:BP) | Effect allele | Other allele | EAF      | Beta      | SE       | P value     | R <sup>2</sup> | Sample size | F statistics |
|-------------|------------------|---------------|--------------|----------|-----------|----------|-------------|----------------|-------------|--------------|
| rs113367286 | 7:140144414      | T             | C            | 0.278467 | 0.01518   | 0.0025   | 1.29999E-09 | 9.26E-05       | 451486      | 42.63836     |
| rs11620149  | 13:89816082      | C             | T            | 0.143308 | -0.017675 | 0.003209 | 3.59998E-08 | 7.67E-05       | 451486      | 35.32049     |
| rs12296440  | 12:49927148      | A             | G            | 0.169681 | 0.018794  | 0.00298  | 2.80001E-10 | 9.95E-05       | 451486      | 45.83245     |
| rs12447542  | 16:7744180       | A             | G            | 0.12558  | 0.019748  | 0.003407 | 6.80002E-09 | 8.56E-05       | 451486      | 39.43759     |
| rs12475594  | 2:58433375       | G             | A            | 0.178459 | 0.016007  | 0.002925 | 4.39997E-08 | 7.51E-05       | 451486      | 34.59716     |
| rs12786959  | 11:89943676      | T             | A            | 0.196267 | -0.016071 | 0.00282  | 0.000000012 | 8.15E-05       | 451486      | 37.52279     |
| rs1434511   | 18:44829435      | T             | C            | 0.455286 | 0.012965  | 0.002259 | 9.49992E-09 | 8.34E-05       | 451486      | 38.3894      |
| rs1806771   | 10:63682387      | G             | T            | 0.087876 | -0.022147 | 0.004035 | 4.09996E-08 | 7.86E-05       | 451486      | 36.20598     |
| rs34198643  | 7:2203808        | T             | C            | 0.224165 | -0.016701 | 0.002679 | 4.49997E-10 | 9.7E-05        | 451486      | 44.67324     |
| rs35270670  | 15:83481880      | G             | A            | 0.217962 | 0.016379  | 0.00271  | 1.5E-09     | 9.15E-05       | 451486      | 42.11612     |
| rs3911016   | 9:88029000       | G             | T            | 0.120938 | 0.021357  | 0.00344  | 5.30005E-10 | 9.7E-05        | 451486      | 44.66024     |
| rs4296548   | 3:36915814       | G             | T            | 0.609594 | 0.013025  | 0.002288 | 0.000000012 | 8.07E-05       | 451486      | 37.18077     |
| rs4692708   | 4:170228542      | C             | A            | 0.252659 | 0.01473   | 0.002589 | 1.29999E-08 | 8.19E-05       | 451486      | 37.73        |
| rs4860341   | 4:61251106       | C             | T            | 0.928742 | 0.024365  | 0.004352 | 2.19999E-08 | 7.86E-05       | 451486      | 36.18318     |
| rs524468    | 12:371786        | G             | A            | 0.260633 | -0.014242 | 0.002552 | 2.39999E-08 | 7.82E-05       | 451486      | 35.99776     |
| rs531358    | 1:93676011       | T             | C            | 0.649768 | 0.013167  | 0.002337 | 1.79999E-08 | 7.89E-05       | 451486      | 36.33287     |
| rs6685323   | 1:154295592      | T             | C            | 0.309293 | -0.013189 | 0.002416 | 4.79999E-08 | 7.43E-05       | 451486      | 34.22139     |
| rs67238148  | 11:7946480       | T             | G            | 0.217471 | 0.016543  | 0.002714 | 1.09999E-09 | 9.31E-05       | 451486      | 42.89289     |
| rs6873324   | 5:153597288      | C             | A            | 0.425802 | -0.012477 | 0.002271 | 3.89996E-08 | 7.61E-05       | 451486      | 35.05088     |
| rs73335955  | 10:106766879     | C             | T            | 0.05334  | 0.027773  | 0.004978 | 2.39999E-08 | 7.79E-05       | 451486      | 35.86889     |
| rs9504123   | 6:4478474        | C             | A            | 0.274743 | 0.014171  | 0.002504 | 0.000000015 | 8E-05          | 451486      | 36.84969     |

#### 11. Cooked vegetable

| SNP | Position(chr:BP) | Effect allele | Other allele | EAF | Beta | SE | P value | R <sup>2</sup> | Sample size | F statistics |
|-----|------------------|---------------|--------------|-----|------|----|---------|----------------|-------------|--------------|
|-----|------------------|---------------|--------------|-----|------|----|---------|----------------|-------------|--------------|

|            |              |   |   |          |           |          |             |          |        |          |
|------------|--------------|---|---|----------|-----------|----------|-------------|----------|--------|----------|
| rs10161952 | 13:59474383  | C | A | 0.31274  | -0.00958  | 0.001686 | 1.29999E-08 | 3.95E-05 | 448651 | 18.16513 |
| rs11138705 | 9:83121545   | C | G | 0.757204 | 0.010372  | 0.00183  | 1.40001E-08 | 3.96E-05 | 448651 | 18.21205 |
| rs12550717 | 8:10266706   | A | G | 0.372413 | 0.009187  | 0.001619 | 1.40001E-08 | 3.95E-05 | 448651 | 18.1678  |
| rs1421085  | 16:53800954  | C | T | 0.40346  | 0.010332  | 0.001591 | 8.30042E-11 | 5.14E-05 | 448651 | 23.65928 |
| rs2052063  | 10:118040352 | T | C | 0.515902 | -0.009458 | 0.001568 | 1.6E-09     | 4.47E-05 | 448651 | 20.57222 |
| rs2252508  | 1:153913770  | G | A | 0.480256 | 0.009102  | 0.001562 | 5.69994E-09 | 4.14E-05 | 448651 | 19.04441 |
| rs28450747 | 4:42137653   | A | G | 0.23257  | -0.01016  | 0.001855 | 4.30002E-08 | 3.69E-05 | 448651 | 16.96813 |
| rs28711392 | 11:13349559  | C | T | 0.367132 | -0.010746 | 0.001632 | 4.60045E-11 | 5.37E-05 | 448651 | 24.70953 |
| rs349062   | 11:84788804  | C | G | 0.39275  | -0.008904 | 0.001598 | 0.000000025 | 3.78E-05 | 448651 | 17.41327 |
| rs4851029  | 2:104159785  | G | T | 0.526969 | 0.010174  | 0.001564 | 7.8001E-11  | 5.16E-05 | 448651 | 23.76395 |

## 12. Tea intake

| SNP        | Position(chr:BP) | Effect allele | Other allele | EAF      | Beta      | SE       | P value     | R <sup>2</sup> | Sample size | F statistics |
|------------|------------------|---------------|--------------|----------|-----------|----------|-------------|----------------|-------------|--------------|
| rs10752269 | 10:12692902      | A             | G            | 0.506082 | -0.012873 | 0.00212  | 1.29999E-09 | 8.28E-05       | 447485      | 38.14653     |
| rs10764990 | 10:129152608     | A             | G            | 0.607155 | -0.012191 | 0.002169 | 1.89998E-08 | 7.09E-05       | 447485      | 32.64418     |
| rs11164870 | 1:93552187       | G             | C            | 0.604574 | -0.01196  | 0.002182 | 4.20001E-08 | 6.84E-05       | 447485      | 31.49487     |
| rs1156588  | 2:58515375       | G             | A            | 0.210071 | -0.015454 | 0.002603 | 2.90001E-09 | 7.93E-05       | 447485      | 36.49845     |
| rs11587444 | 1:150722844      | G             | A            | 0.393464 | 0.014033  | 0.002171 | 1E-10       | 9.4E-05        | 447485      | 43.28078     |
| rs13282783 | 8:22088975       | T             | C            | 0.285899 | -0.013584 | 0.002354 | 7.90005E-09 | 7.53E-05       | 447485      | 34.69326     |
| rs132904   | 22:41798896      | C             | G            | 0.778651 | 0.016601  | 0.002553 | 7.8001E-11  | 9.5E-05        | 447485      | 43.744       |
| rs1453548  | 11:59192089      | A             | T            | 0.664929 | -0.013341 | 0.00225  | 2.99999E-09 | 7.93E-05       | 447485      | 36.5219      |
| rs1481012  | 4:89039082       | G             | A            | 0.112209 | -0.026244 | 0.003356 | 5.30029E-15 | 0.000137       | 447485      | 63.18959     |
| rs17245213 | 11:1679769       | A             | G            | 0.208046 | -0.014648 | 0.002609 | 0.00000002  | 7.07E-05       | 447485      | 32.55792     |
| rs17685    | 7:75616105       | A             | G            | 0.277512 | 0.023066  | 0.002362 | 1.59993E-22 | 0.000213       | 447485      | 98.25051     |
| rs2117137  | 3:89525505       | G             | A            | 0.405148 | 0.012995  | 0.002156 | 1.7E-09     | 8.14E-05       | 447485      | 37.48014     |
| rs2273447  | 20:62900120      | T             | A            | 0.203788 | 0.017472  | 0.002634 | 3.29989E-11 | 9.91E-05       | 447485      | 45.61574     |



|            |              |   |   |          |           |          |             |          |        |           |
|------------|--------------|---|---|----------|-----------|----------|-------------|----------|--------|-----------|
| rs2279844  | 17:40819809  | A | G | 0.379343 | -0.011988 | 0.002183 | 0.00000004  | 6.77E-05 | 447485 | 31.16042  |
| rs2351187  | 10:86850616  | A | G | 0.318935 | 0.012902  | 0.002282 | 0.000000016 | 7.23E-05 | 447485 | 33.30124  |
| rs2472297  | 15:75027880  | T | C | 0.262049 | 0.053345  | 0.002401 | 2.3014E-109 | 0.001101 | 447485 | 507.32305 |
| rs2478875  | 6:51283110   | G | A | 0.208758 | 0.021894  | 0.002611 | 5.10035E-17 | 0.000158 | 447485 | 72.92683  |
| rs2645929  | 13:56444529  | G | A | 0.813066 | -0.014984 | 0.002717 | 3.50002E-08 | 6.83E-05 | 447485 | 31.42786  |
| rs34619    | 5:60465365   | A | G | 0.430905 | 0.011712  | 0.002138 | 4.30002E-08 | 6.73E-05 | 447485 | 30.977    |
| rs4410790  | 7:17284577   | C | T | 0.631224 | 0.040551  | 0.002195 | 3.40017E-76 | 0.000766 | 447485 | 352.75835 |
| rs4808193  | 19:19410622  | C | T | 0.335324 | 0.015115  | 0.002247 | 1.69981E-11 | 0.000102 | 447485 | 46.89574  |
| rs4817505  | 21:34343828  | C | T | 0.38998  | 0.015068  | 0.002175 | 4.19952E-12 | 0.000108 | 447485 | 49.7449   |
| rs56348300 | 9:7054124    | G | C | 0.184619 | 0.015882  | 0.002732 | 6.1E-09     | 7.59E-05 | 447485 | 34.97085  |
| rs57462170 | 3:50239803   | A | G | 0.108773 | 0.019151  | 0.003406 | 1.89998E-08 | 7.11E-05 | 447485 | 32.74195  |
| rs57631352 | 19:4338173   | G | A | 0.296859 | -0.013104 | 0.002321 | 0.000000017 | 7.17E-05 | 447485 | 33.00672  |
| rs6829     | 13:111531264 | T | C | 0.596155 | -0.011916 | 0.002165 | 3.69999E-08 | 6.84E-05 | 447485 | 31.48404  |
| rs713598   | 7:141673345  | G | C | 0.402254 | 0.013397  | 0.002157 | 5.19996E-10 | 8.63E-05 | 447485 | 39.7436   |
| rs72797284 | 5:152031650  | G | A | 0.270797 | -0.017115 | 0.002384 | 7.00003E-13 | 0.000116 | 447485 | 53.2703   |
| rs7757102  | 6:137222671  | G | A | 0.555426 | -0.011804 | 0.002133 | 3.09999E-08 | 6.88E-05 | 447485 | 31.68511  |
| rs9302428  | 16:24717600  | G | C | 0.635799 | 0.012246  | 0.002201 | 2.59998E-08 | 6.94E-05 | 447485 | 31.97881  |
| rs9624470  | 22:24820268  | A | G | 0.580054 | 0.025207  | 0.002155 | 1.29987E-31 | 0.00031  | 447485 | 142.57589 |

### 13. Fresh fruit

| SNP        | Position(chr:BP) | Effect allele | Other allele | EAF      | Beta      | SE       | P value     | R <sup>2</sup> | Sample size | F statistics |
|------------|------------------|---------------|--------------|----------|-----------|----------|-------------|----------------|-------------|--------------|
| rs10064431 | 5:92950673       | C             | T            | 0.522495 | -0.007574 | 0.001224 | 5.99998E-10 | 2.86E-05       | 446462      | 13.18008     |
| rs10249294 | 7:143723137      | A             | G            | 0.372973 | 0.019564  | 0.001263 | 4.10015E-54 | 0.000179       | 446462      | 82.44178     |
| rs1051547  | 16:19279380      | C             | T            | 0.561537 | -0.007575 | 0.001242 | 1.09999E-09 | 2.83E-05       | 446462      | 13.01126     |
| rs11032362 | 11:33759092      | A             | G            | 0.090976 | 0.012393  | 0.002123 | 5.30005E-09 | 2.54E-05       | 446462      | 11.69669     |
| rs11085749 | 19:10961273      | A             | G            | 0.387076 | -0.007734 | 0.001255 | 7.10003E-10 | 2.84E-05       | 446462      | 13.06724     |

|            |              |   |   |          |           |          |             |          |        |          |
|------------|--------------|---|---|----------|-----------|----------|-------------|----------|--------|----------|
| rs11248509 | 10:125134393 | T | A | 0.371237 | 0.00733   | 0.001268 | 7.39997E-09 | 2.51E-05 | 446462 | 11.54859 |
| rs11896330 | 2:60235568   | A | G | 0.632839 | -0.008446 | 0.001274 | 3.40017E-11 | 3.31E-05 | 446462 | 15.26288 |
| rs12536253 | 7:127595077  | C | G | 0.24901  | -0.008159 | 0.001416 | 8.30004E-09 | 2.49E-05 | 446462 | 11.4653  |
| rs12641371 | 4:59882235   | T | C | 0.433148 | 0.007913  | 0.001234 | 1.40001E-10 | 3.07E-05 | 446462 | 14.15708 |
| rs12885598 | 14:32071665  | A | G | 0.596671 | 0.007515  | 0.001247 | 1.7E-09     | 2.72E-05 | 446462 | 12.51771 |
| rs13072255 | 3:21038260   | C | A | 0.493966 | 0.00898   | 0.001224 | 2.09991E-13 | 4.03E-05 | 446462 | 18.56361 |
| rs17049185 | 2:58072660   | T | G | 0.267872 | 0.00804   | 0.00139  | 7.29995E-09 | 2.54E-05 | 446462 | 11.67583 |
| rs1866823  | 8:57436577   | A | G | 0.544469 | 0.007431  | 0.001241 | 2.1E-09     | 2.74E-05 | 446462 | 12.6118  |
| rs2093654  | 9:5780121    | G | A | 0.388133 | 0.007129  | 0.001259 | 0.000000015 | 2.41E-05 | 446462 | 11.11546 |
| rs2143081  | 6:50782834   | A | G | 0.539822 | 0.008321  | 0.001229 | 1.29987E-11 | 3.44E-05 | 446462 | 15.83865 |
| rs329274   | 7:35078743   | G | A | 0.485636 | 0.006818  | 0.001228 | 2.80001E-08 | 2.32E-05 | 446462 | 10.69419 |
| rs4302893  | 9:1734863    | A | G | 0.334189 | 0.007389  | 0.0013   | 1.29999E-08 | 2.43E-05 | 446462 | 11.18609 |
| rs559734   | 1:97304868   | C | G | 0.711817 | 0.007768  | 0.001361 | 1.09999E-08 | 2.48E-05 | 446462 | 11.39926 |
| rs7869969  | 9:96217447   | G | A | 0.330836 | 0.007567  | 0.001299 | 5.69994E-09 | 2.54E-05 | 446462 | 11.67485 |
| rs7982441  | 13:55924013  | C | T | 0.731883 | -0.008413 | 0.001376 | 9.80009E-10 | 2.78E-05 | 446462 | 12.78911 |
| rs8095324  | 18:24131659  | G | A | 0.404041 | -0.006946 | 0.001249 | 2.69998E-08 | 2.32E-05 | 446462 | 10.69896 |
| rs9517948  | 13:100650708 | T | C | 0.451352 | 0.006953  | 0.001233 | 0.000000017 | 2.39E-05 | 446462 | 11.02521 |

#### 14. Cereal intake

| SNP         | Position(chr:BP) | Effect allele | Other allele | EAF      | Beta      | SE       | P value     | R <sup>2</sup> | Sample size | F statistics |
|-------------|------------------|---------------|--------------|----------|-----------|----------|-------------|----------------|-------------|--------------|
| rs10057775  | 5:87469663       | C             | T            | 0.893563 | 0.020029  | 0.002894 | 4.49987E-12 | 7.63E-05       | 441640      | 35.13876     |
| rs10857964  | 1:113097633      | C             | T            | 0.205117 | 0.014087  | 0.002205 | 1.7E-10     | 6.47E-05       | 441640      | 29.79541     |
| rs11038810  | 11:46210773      | G             | A            | 0.644091 | 0.011134  | 0.001863 | 2.30001E-09 | 5.68E-05       | 441640      | 26.17223     |
| rs11097340  | 4:93465297       | T             | C            | 0.399592 | -0.011533 | 0.001815 | 2.1E-10     | 6.38E-05       | 441640      | 29.39068     |
| rs112780312 | 1:153797015      | A             | G            | 0.274969 | -0.012148 | 0.002019 | 1.79999E-09 | 5.88E-05       | 441640      | 27.09573     |
| rs11940694  | 4:39414993       | G             | A            | 0.604068 | -0.012665 | 0.001834 | 5.00035E-12 | 7.67E-05       | 441640      | 35.32918     |

|            |             |   |   |          |           |          |             |          |        |          |
|------------|-------------|---|---|----------|-----------|----------|-------------|----------|--------|----------|
| rs13234131 | 7:73025975  | G | A | 0.128369 | 0.017012  | 0.00266  | 1.6E-10     | 6.48E-05 | 441640 | 29.82087 |
| rs2450126  | 11:77916279 | G | A | 0.156746 | -0.014902 | 0.002457 | 1.29999E-09 | 5.87E-05 | 441640 | 27.03134 |
| rs2472297  | 15:75027880 | T | C | 0.261458 | -0.015852 | 0.002022 | 4.49987E-15 | 9.7E-05  | 441640 | 44.68692 |
| rs2504706  | 6:51258579  | C | T | 0.234682 | 0.018179  | 0.002102 | 5.30029E-18 | 0.000119 | 441640 | 54.6678  |
| rs2817377  | 6:50789176  | A | G | 0.537948 | 0.009901  | 0.001789 | 3.09999E-08 | 4.87E-05 | 441640 | 22.43884 |
| rs3115230  | 4:123009766 | A | C | 0.752001 | -0.011478 | 0.002071 | 2.99999E-08 | 4.91E-05 | 441640 | 22.62656 |
| rs4410790  | 7:17284577  | C | T | 0.630668 | -0.010914 | 0.001847 | 3.40001E-09 | 5.55E-05 | 441640 | 25.55275 |
| rs4739095  | 8:64391730  | A | G | 0.765732 | -0.012866 | 0.002105 | 9.90011E-10 | 5.94E-05 | 441640 | 27.34511 |
| rs4797242  | 18:6407483  | A | C | 0.297207 | 0.011431  | 0.001949 | 4.49997E-09 | 5.46E-05 | 441640 | 25.13609 |
| rs491711   | 11:28742220 | C | A | 0.311975 | 0.011689  | 0.001934 | 1.5E-09     | 5.87E-05 | 441640 | 27.00667 |
| rs6545770  | 2:60204427  | T | A | 0.748101 | -0.013728 | 0.00206  | 2.70023E-11 | 7.1E-05  | 441640 | 32.70665 |
| rs68136852 | 17:27382061 | A | C | 0.152389 | -0.014122 | 0.002478 | 0.000000012 | 5.15E-05 | 441640 | 23.72364 |
| rs6918737  | 6:19721681  | A | T | 0.234488 | 0.013733  | 0.00211  | 7.59976E-11 | 6.77E-05 | 441640 | 31.17491 |
| rs7040561  | 9:128528978 | A | T | 0.850635 | -0.016269 | 0.00252  | 1.09999E-10 | 6.73E-05 | 441640 | 30.96851 |
| rs7619139  | 3:25110415  | A | T | 0.588533 | -0.016951 | 0.001815 | 9.70063E-21 | 0.000139 | 441640 | 64.08567 |
| rs79642906 | 5:59650336  | A | G | 0.083314 | -0.018158 | 0.003228 | 1.89998E-08 | 5.04E-05 | 441640 | 23.19024 |
| rs8097544  | 18:1839564  | G | A | 0.145206 | -0.024637 | 0.002541 | 3.19963E-22 | 0.000151 | 441640 | 69.38795 |
| rs9987289  | 8:9183358   | G | A | 0.908767 | 0.017868  | 0.003095 | 7.79992E-09 | 5.29E-05 | 441640 | 24.3769  |

---

15. Salad/raw vegetable

| SNP        | Position(chr:BP) | Effect allele | Other allele | EAF      | Beta      | SE       | P value     | R <sup>2</sup> | Sample size | F statistics |
|------------|------------------|---------------|--------------|----------|-----------|----------|-------------|----------------|-------------|--------------|
| rs10819082 | 9:128645617      | A             | G            | 0.66734  | -0.009165 | 0.001513 | 1.40001E-09 | 3.73E-05       | 435435      | 17.17154     |
| rs12908495 | 15:97011280      | A             | C            | 0.242533 | -0.00935  | 0.001666 | 0.00000002  | 3.21E-05       | 435435      | 14.79026     |
| rs1890012  | 13:54933682      | G             | T            | 0.19473  | -0.010426 | 0.001808 | 8.10009E-09 | 3.41E-05       | 435435      | 15.69683     |
| rs4083969  | 1:231866480      | G             | C            | 0.057217 | 0.017133  | 0.003115 | 3.79997E-08 | 3.17E-05       | 435435      | 14.58214     |
| rs62461186 | 7:77730153       | C             | A            | 0.179827 | -0.011344 | 0.001857 | 0.000000001 | 3.8E-05        | 435435      | 17.47825     |

|           |             |   |   |          |           |          |             |          |        |          |
|-----------|-------------|---|---|----------|-----------|----------|-------------|----------|--------|----------|
| rs7821179 | 8:83061099  | C | G | 0.846577 | -0.010818 | 0.001976 | 4.39997E-08 | 3.04E-05 | 435435 | 13.9991  |
| rs8130508 | 21:19049865 | A | G | 0.289686 | 0.00874   | 0.001578 | 2.99999E-08 | 3.14E-05 | 435435 | 14.47632 |

#### 16. Coffee intake

| SNP        | Position(chr:BP) | Effect allele | Other allele | EAF      | Beta      | SE       | P value     | R <sup>2</sup> | Sample size | F statistics |
|------------|------------------|---------------|--------------|----------|-----------|----------|-------------|----------------|-------------|--------------|
| rs12514566 | 5:7391462        | A             | G            | 0.337107 | -0.011397 | 0.001706 | 2.39994E-11 | 5.81E-05       | 428860      | 26.73233     |
| rs12989746 | 2:49368391       | T             | G            | 0.249928 | 0.01035   | 0.001864 | 2.80001E-08 | 4.02E-05       | 428860      | 18.49354     |
| rs1527961  | 2:62780440       | C             | T            | 0.1349   | -0.013343 | 0.002366 | 0.000000017 | 4.16E-05       | 428860      | 19.13435     |
| rs442355   | 8:109128653      | C             | G            | 0.254435 | -0.011137 | 0.001854 | 1.89998E-09 | 4.71E-05       | 428860      | 21.669       |
| rs57918684 | 17:60150383      | A             | G            | 0.154747 | 0.012886  | 0.002238 | 8.60003E-09 | 4.34E-05       | 428860      | 20.00299     |
| rs6062682  | 20:62891820      | T             | C            | 0.464546 | 0.01037   | 0.001639 | 2.5E-10     | 5.35E-05       | 428860      | 24.63594     |
| rs6063085  | 20:45840459      | C             | A            | 0.373473 | 0.010411  | 0.001669 | 4.49997E-10 | 5.07E-05       | 428860      | 23.35482     |
| rs62064918 | 17:46155786      | T             | C            | 0.244545 | -0.010308 | 0.001879 | 4.09996E-08 | 3.93E-05       | 428860      | 18.0757      |
| rs630194   | 18:40950954      | C             | T            | 0.343374 | -0.011353 | 0.001699 | 2.29985E-11 | 5.81E-05       | 428860      | 26.76449     |
| rs6469262  | 8:110443480      | C             | T            | 0.564966 | -0.009153 | 0.001629 | 1.89998E-08 | 4.12E-05       | 428860      | 18.96439     |
| rs73075167 | 7:17570479       | T             | A            | 0.12918  | -0.016064 | 0.002444 | 5.00035E-11 | 5.81E-05       | 428860      | 26.73344     |

#### 17. Dried fruit intake

| SNP        | Position(chr:BP) | Effect allele | Other allele | EAF      | Beta      | SE       | P value     | R <sup>2</sup> | Sample size | F statistics |
|------------|------------------|---------------|--------------|----------|-----------|----------|-------------|----------------|-------------|--------------|
| rs10129747 | 14:77433198      | G             | A            | 0.530254 | 0.009359  | 0.001681 | 2.59998E-08 | 4.36E-05       | 421764      | 20.09235     |
| rs11152349 | 18:60233646      | A             | G            | 0.302856 | 0.009912  | 0.001818 | 4.90004E-08 | 4.15E-05       | 421764      | 19.10365     |
| rs11586016 | 1:44031793       | C             | G            | 0.371004 | 0.009878  | 0.00173  | 1.09999E-08 | 4.55E-05       | 421764      | 20.97027     |
| rs11632215 | 15:45319982      | C             | A            | 0.120179 | -0.014143 | 0.002584 | 4.39997E-08 | 4.23E-05       | 421764      | 19.47838     |
| rs1582322  | 16:52105988      | G             | A            | 0.604805 | 0.009943  | 0.001716 | 6.80002E-09 | 4.73E-05       | 421764      | 21.76338     |
| rs1622515  | 11:95523433      | G             | A            | 0.484704 | 0.009917  | 0.001671 | 2.90001E-09 | 4.91E-05       | 421764      | 22.62226     |

|            |              |   |   |          |           |          |             |          |        |          |
|------------|--------------|---|---|----------|-----------|----------|-------------|----------|--------|----------|
| rs1648404  | 4:37175523   | T | C | 0.476112 | 0.009416  | 0.001674 | 1.79999E-08 | 4.42E-05 | 421764 | 20.36569 |
| rs261809   | 1:241054465  | G | A | 0.540636 | -0.009629 | 0.001679 | 9.80009E-09 | 4.6E-05  | 421764 | 21.20364 |
| rs4140799  | 14:72170969  | A | G | 0.531856 | 0.009457  | 0.001678 | 1.79999E-08 | 4.45E-05 | 421764 | 20.50534 |
| rs57499472 | 3:147239337  | C | T | 0.404131 | 0.009912  | 0.001719 | 8.10009E-09 | 4.73E-05 | 421764 | 21.7895  |
| rs7582086  | 2:60231826   | T | G | 0.468273 | -0.009628 | 0.001674 | 8.79995E-09 | 4.62E-05 | 421764 | 21.25705 |
| rs7808471  | 7:132716502  | C | T | 0.322136 | -0.011536 | 0.001786 | 1.09999E-10 | 5.81E-05 | 421764 | 26.76311 |
| rs7829800  | 8:144258705  | G | A | 0.671041 | -0.010446 | 0.001787 | 5.1E-09     | 4.82E-05 | 421764 | 22.18404 |
| rs893856   | 10:126723567 | A | G | 0.148988 | -0.013361 | 0.002349 | 1.29999E-08 | 4.53E-05 | 421764 | 20.84436 |

---
