# Supplementary material for: Causal relationships between dietary habits and Barrett's esophagus risk: a univariable and multivariable Mendelian randomization study
Source: Royal Society of Chemistry journal article supplement (doi:10.1039/d3fo05273g), 2024-01-01
Supplement: d3fo05273g8.pdf [file d3fo05273g8.pdf]

Table S3. MR estimates of associations between seventeen dietary habits and Barrett's Esophagus risk.

| Exposures                       | MR methods      | OR (95%CI)                                                            | <i>p</i> value        |
|---------------------------------|-----------------|-----------------------------------------------------------------------|-----------------------|
| <b>Alcohol intake frequency</b> | MR Egger        | 1.43(0.29, 6.97)                                                      | 0.66                  |
|                                 | Weighted median | 2.13(1.43, 3.18)                                                      | 2.23*10 <sup>-4</sup> |
|                                 | IVW             | 2.14(1.58, 2.91)                                                      | 1.11*10 <sup>-6</sup> |
| Processed meat intake           | MR Egger        | 2.32(0, 6736.28)                                                      | 0.82                  |
|                                 | Weighted median | 1.77(0.53, 5.94)                                                      | 0.36                  |
|                                 | IVW             | 2.60(0.94, 7.02)                                                      | 0.07                  |
| Poultry intake                  | MR Egger        | 0.003(1.79x10 <sup>-18</sup> , 4.26x10 <sup>12</sup> )                | 0.76                  |
|                                 | Weighted median | 1.61(0.39, 6.55)                                                      | 0.51                  |
|                                 | IVW             | 1.28(0.40, 4.11)                                                      | 0.68                  |
| <b>Beef intake</b>              | MR Egger        | 0.38(4.67x10 <sup>-4</sup> , 316.41)                                  | 0.79                  |
|                                 | Weighted median | 0.42(0.12, 1.46)                                                      | 0.17                  |
|                                 | IVW             | 0.34(0.12, 0.93)                                                      | 0.04                  |
| Non-oily fish intake            | MR Egger        | 6.08x10 <sup>11</sup> (2.14x10 <sup>4</sup> , 1.73x10 <sup>19</sup> ) | 0.20                  |
|                                 | Weighted median | 29.80(2.33, 380.31)                                                   | 0.01                  |
|                                 | IVW             | 9.65(0.26, 358.23)                                                    | 0.22                  |
| Oily fish intake                | MR Egger        | 2.40(0.31, 18.41)                                                     | 0.41                  |
|                                 | Weighted median | 0.85(0.45, 1.61)                                                      | 0.62                  |
|                                 | IVW             | 0.72(0.47, 1.23)                                                      | 0.15                  |
| Pork intake                     | MR Egger        | 1.5x10 <sup>-4</sup> (2.61x10 <sup>-18</sup> , 8.59x10 <sup>9</sup> ) | 0.64                  |
|                                 | Weighted median | 1.48(0.19, 11.25)                                                     | 0.71                  |
|                                 | IVW             | 2.84(0.46, 18.12)                                                     | 0.27                  |
| Lamb/mutton intake              | MR Egger        | 12.91(0.19, 865.20)                                                   | 0.25                  |
|                                 | Weighted median | 0.89(0.31, 2.52)                                                      | 0.83                  |
|                                 | IVW             | 0.81(0.37, 1.78)                                                      | 0.60                  |
| <b>Bread intake</b>             | MR Egger        | 0.35(0.01, 9.33)                                                      | 0.55                  |
|                                 | Weighted median | 0.33(0.12, 0.92)                                                      | 0.03                  |
|                                 | IVW             | 0.37(0.16, 0.86)                                                      | 0.02                  |
| Cheese intake                   | MR Egger        | 0.74(0.03, 16.06)                                                     | 0.85                  |
|                                 | Weighted median | 0.65(0.31, 1.33)                                                      | 0.23                  |
|                                 | IVW             | 0.57(0.32, 1.03)                                                      | 0.06                  |
| <b>Cooked vegetable intake</b>  | MR Egger        | 703.13(6.79x10 <sup>-5</sup> , 7.29x10 <sup>9</sup> )                 | 0.45                  |
|                                 | Weighted median | 18.49(4.63, 73.95)                                                    | 3.69*10 <sup>-5</sup> |
|                                 | IVW             | 20.21(7.43, 54.96)                                                    | 3.90*10 <sup>-9</sup> |
| Tea intake                      | MR Egger        | 1.05(0.47, 2.31)                                                      | 0.91                  |
|                                 | Weighted median | 1.30(0.82, 2.05)                                                      | 0.26                  |
|                                 | IVW             | 1.30(0.91, 1.85)                                                      | 0.16                  |
| <b>Fresh fruit intake</b>       | MR Egger        | 0.19(7.67x10 <sup>-3</sup> , 4.61)                                    | 0.32                  |
|                                 | Weighted median | 0.23(0.07, 0.76)                                                      | 0.02                  |
|                                 | IVW             | 0.28(0.11, 0.71)                                                      | 0.01                  |

|                                   |                 |                                                     |       |
|-----------------------------------|-----------------|-----------------------------------------------------|-------|
| Cereal intake                     | MR Egger        | 0.88(0.09, 8.49)                                    | 0.91  |
|                                   | Weighted median | 0.48(0.24, 0.96)                                    | 0.04  |
|                                   | IVW             | 0.67(0.41, 1.12)                                    | 0.12  |
| <b>Salad/raw vegetable intake</b> | MR Egger        | 0.60(7.07x10 <sup>-6</sup> , 5x10 <sup>4</sup> )    | 0.93  |
|                                   | Weighted median | 0.22(0.03, 1.68)                                    | 0.14  |
|                                   | IVW             | 0.15(0.02, 0.89)                                    | 0.04  |
| Coffee intake                     | MR Egger        | 9.8x10 <sup>-3</sup> (1.38x10 <sup>-5</sup> , 6.95) | 0.20  |
|                                   | Weighted median | 1.19(0.34, 4.14)                                    | 0.78  |
|                                   | IVW             | 0.71(0.29, 1.79)                                    | 0.47  |
| <b>Dried fruit intake</b>         | MR Egger        | 0.15(2.87*10 <sup>-5</sup> , 792.81)                | 0.67  |
|                                   | Weighted median | 0.47(0.14, 1.51)                                    | 0.20  |
|                                   | IVW             | 0.26(0.10, 0.65)                                    | 0.004 |
