# Supplementary figures and images for: Causal relationships between dietary habits and Barrett's esophagus risk: a univariable and multivariable Mendelian randomization study
Source: Royal Society of Chemistry journal article supplement (doi:10.1039/d3fo05273g), 2024-01-01

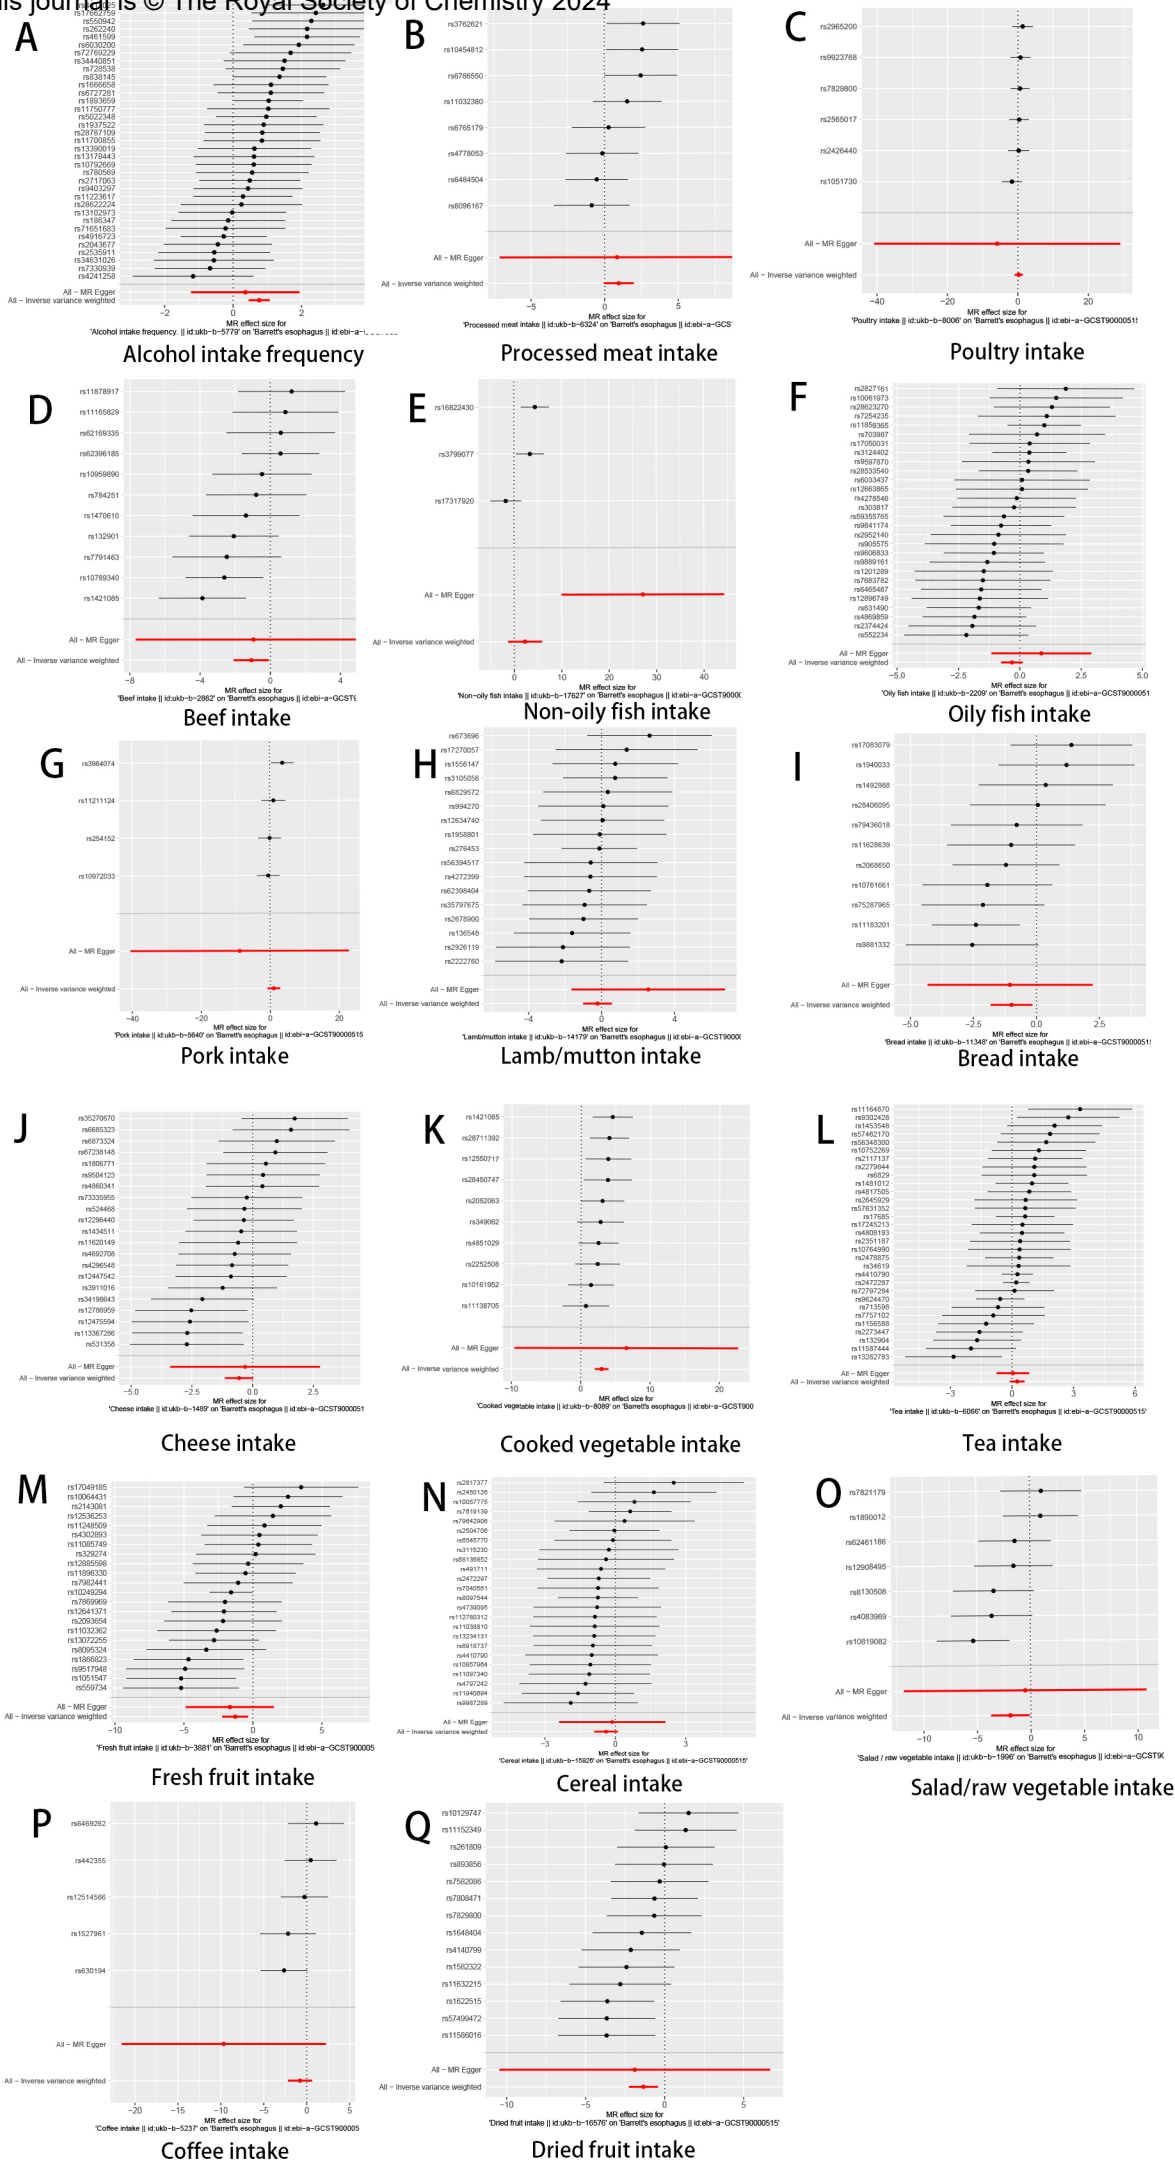

Supplement: d3fo05273g2.pdf [file d3fo05273g2.pdf]

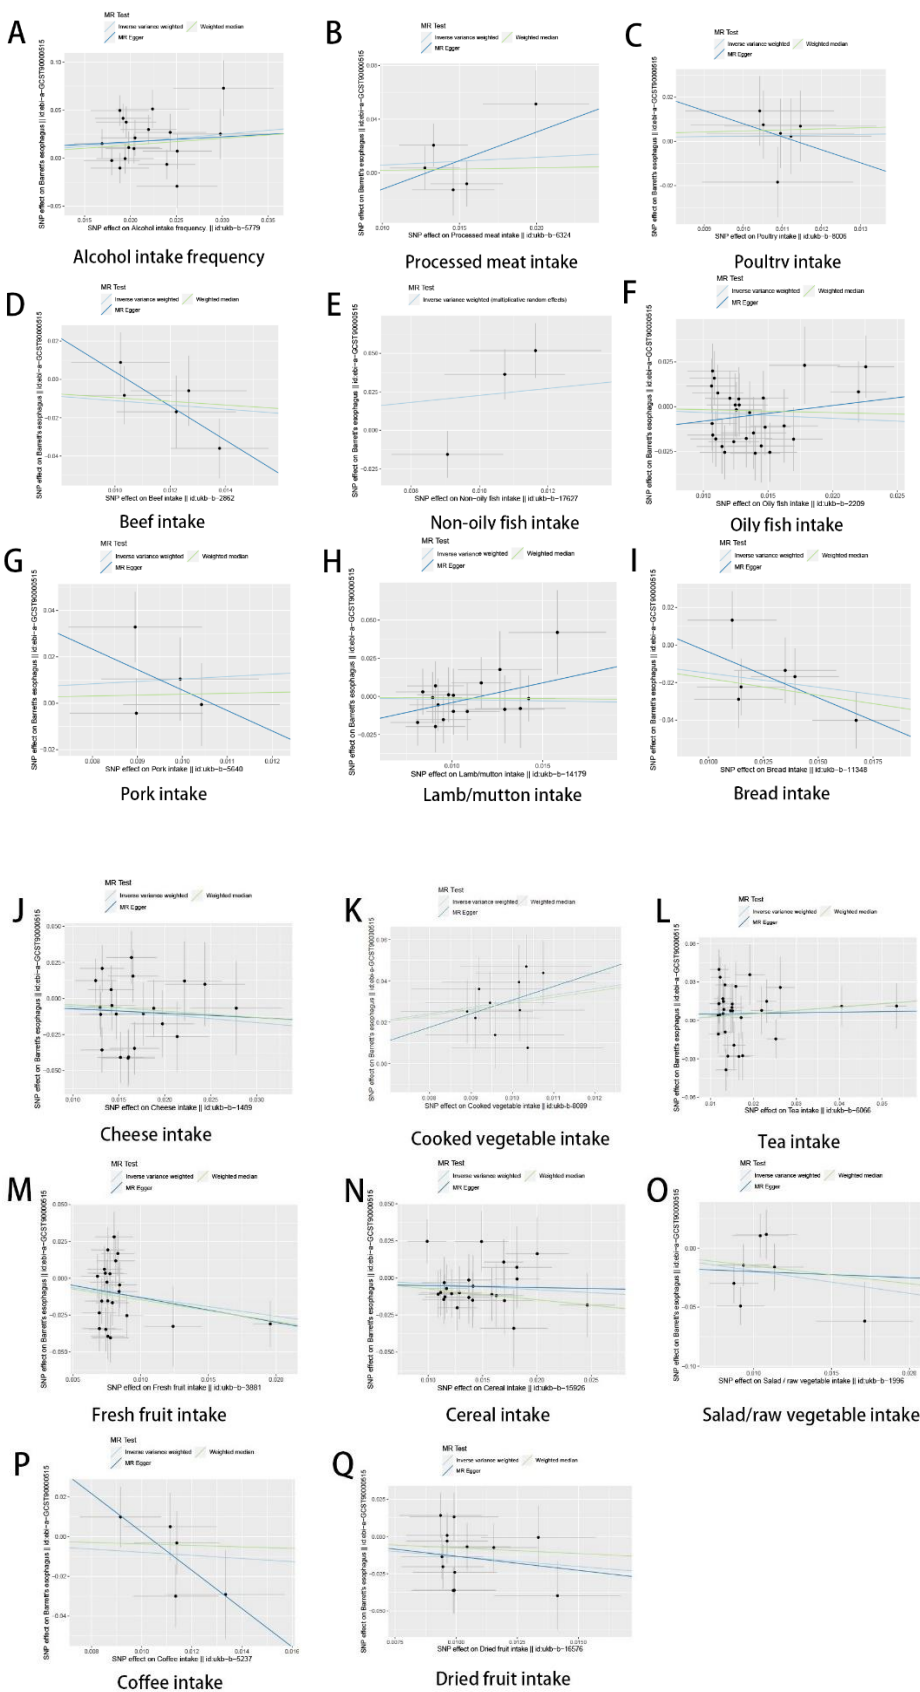

Supplement: d3fo05273g3.pdf [file d3fo05273g3.pdf]

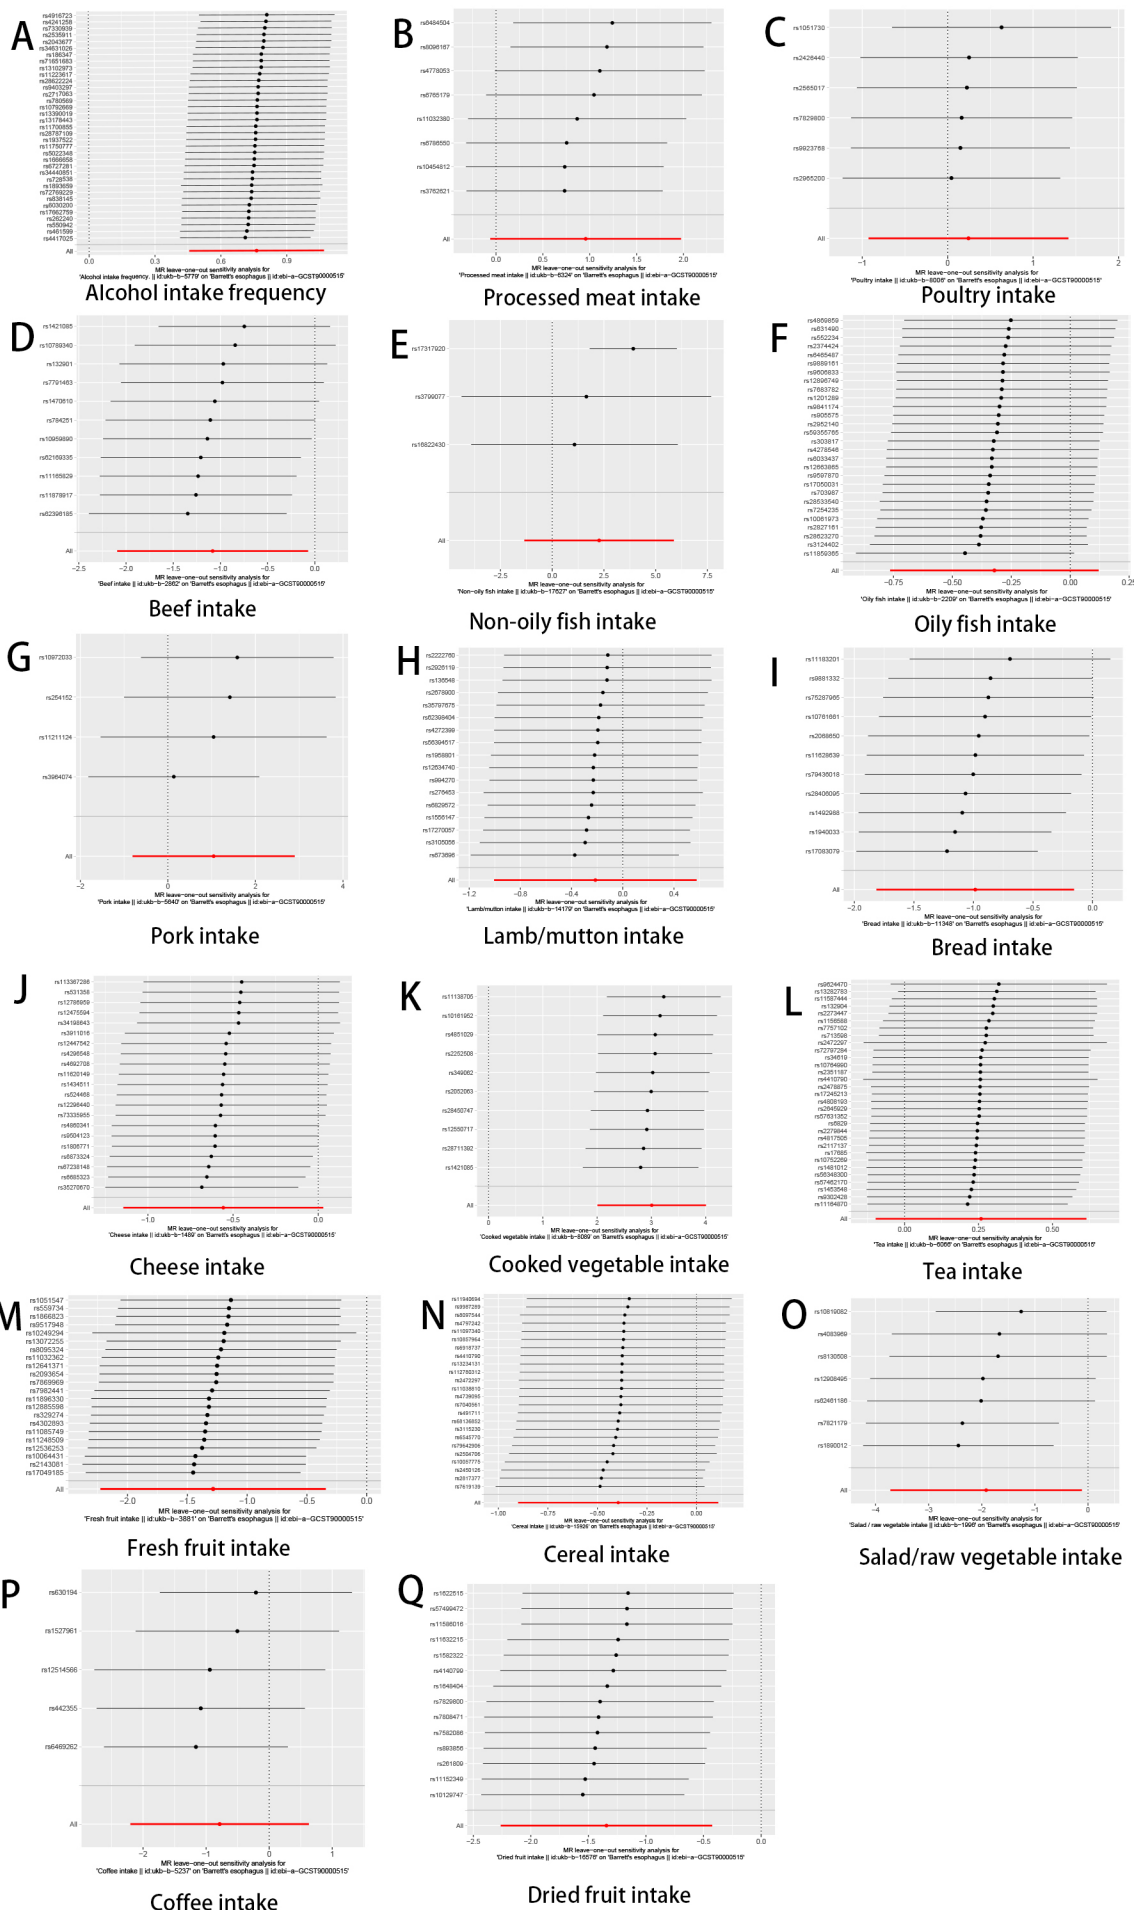

Supplement: d3fo05273g4.pdf [file d3fo05273g4.pdf]

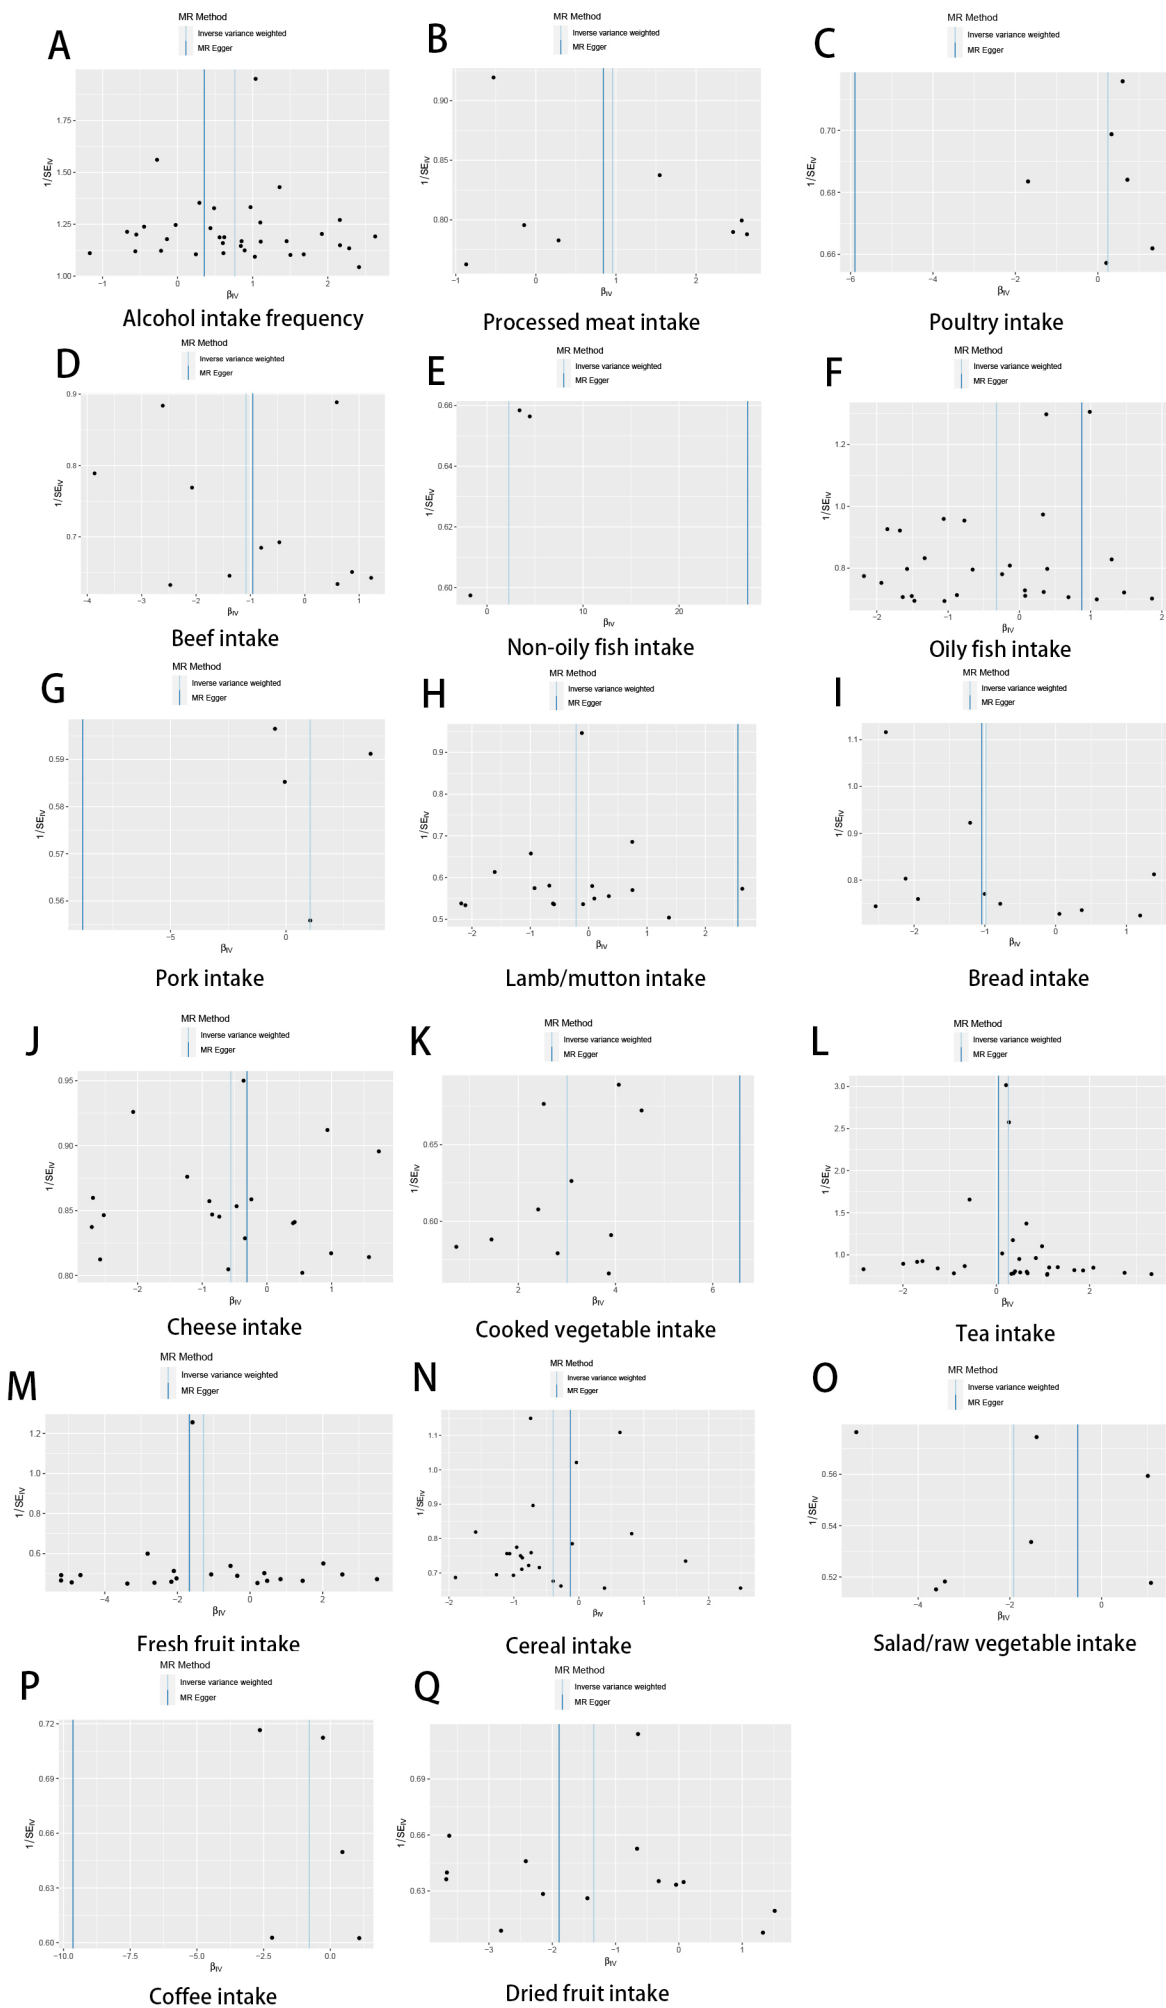

Supplement: d3fo05273g5.pdf [file d3fo05273g5.pdf]
